23 system.

24 **Aim:** To study the major influence factors of the mean particle size of bacterial aerosols  
25 and positive quality control value of BFE system.

26 **Method and Results:** In this study, we investigated the influence of Anderson sampler,  
27 spray flow, medium thickness, and peristaltic pump flow on the MPS of bacterial  
28 aerosols and positive quality control value of BFE system, respectively. The results  
29 show that the machining accuracy of Anderson sampler has great influence on aerosol  
30 MPS and positive quality control value. With the increase of aerosol spray flow rate,  
31 the positive quality control value will increase gradually, but the effect on aerosol MPS  
32 is not a simple linear relationship. As the agar medium thickness increased, the positive  
33 quality control value and aerosol MPS increased gradually. With the increase of  
34 peristaltic pump flow, the positive quality control value increased gradually, while the  
35 aerosol MPS was basically in a downward trend. When the peristaltic pump flow rate  
36 was 0.1mL/min, the spray flow rate was 7.2L/min, the agar plate thickness was 27mL,  
37 and the Anderson sampler of Beijing Mingjie was used for the experiment, the aerosol  
38 MPS and positive quality control value were both within the acceptable range and were  
39 the optimal parameters.

40 **Conclusions:** This study provides guidance for the manufacturers of the BFE system  
41 and improves the protective performance of masks, which is important for the human  
42 health, especially during the occurrence of viral pandemics such as "COVID-19".

43 **Key word:** COVID-19; Mask; BFE system; MPS; Positive quality control value

44

45

## 46 **Introduction**

47 In December 2019, an outbreak of the Coronavirus Disease 2019 (COVID-19)  
48 occurred in the city of Wuhan, China. The COVID-19 has hit all regions in China and  
49 almost all countries worldwide at an unprecedented transmission rate, and was declared  
50 as a Public Health Emergency of International Concern (PHEIC) by the World Health  
51 Organization (WHO) <sup>[1]</sup>. The occurrence of viral pandemics with extensive  
52 transmission and the associated health impact is a big concern around the globe, which  
53 raises the importance of respiratory protection against the viral transmission. Aerosol  
54 transmission is the main routes of COVID-19 transmission. Coughing, sneezing, and  
55 talking can transmits microbial aerosols through the air, potentially carrying infectious  
56 diseases <sup>[2]</sup>. The associated risk can be exacerbated when pathogenic microbials  
57 including bacteria and virus are present in the air <sup>[3,4]</sup>. The role of respiratory protection  
58 becomes particularly important in the occurrence of viral pandemics such as "COVID-  
59 19", SARS, and H1N1 influenza <sup>[3-6]</sup>.

60 Mask has been used for more than 100 years to prevent the spread of respiratory  
61 infectious diseases and surgical infections <sup>[7-11]</sup>. The role of mask is to prevent harmful  
62 aerosols from the human body instead of being inhaled into the lungs, including dust,  
63 smoke, bacteria, and virus. Using masks to prevent viral transmission has been  
64 recommend by many international guidelines <sup>[12-14]</sup>. MacIntyre et al. <sup>[15]</sup> reported that  
65 masks can reduce the risk of influenza infection significantly. Brienen et al. <sup>[16]</sup> showed  
66 that population-wide use of face masks could make an important contribution in  
67 delaying an influenza pandemic. Van der Sande et al. <sup>[17]</sup> have indicated that the

68 protective factor of surgical masks was 4.1–5.3, while the protective factor of  
69 homemade masks was 2.2–2.5, which could reduce the respiratory infections of the  
70 population to a certain extent. With the outbreak of "COVID-19", the disposable masks  
71 are in short supply, and the demand for masks bacterial filtration efficiency detector is  
72 rising rapidly [18]. From 20 Jan 2020 to 30 Jun 2020, the largest daily facemask  
73 shortages in China were predicted to be 589.5, 49.3, and 37.5 million in the mask-  
74 wearing policy in all regions of mainland, the mask-wearing policy only in Hubei  
75 province, and the non-implementation of the mask-wearing policy in other region,  
76 respectively [19, 20].

77 An important parameter to evaluate the performance of a mask is the bacteria  
78 filtration efficiency (BFE) [21]. BFE refers to the percentage of the respirator material  
79 filtered out of the bacteria-containing suspended particles under the specified flow rate,  
80 which reflects the filtration quality of the respirator. The protective performance of a  
81 mask mainly depends on the filtration efficiency of the mask. How to ensure the mean  
82 particle size (MPS) of bacterial aerosols and the positive quality control value are the  
83 most critical indicators of the mask BFE detector, and is also the current research  
84 hotspots [22]. In this study, the major influence factors of the MPS and positive quality  
85 control value of the BFE system were investigated, including Anderson sampler, spray  
86 flow, medium thickness, and peristaltic pump flow, which provides guidance for the  
87 manufacturers of the BFE detector and improve the protective performance of masks  
88 under the pandemics of COVID-19.

89

## 90 **Materials and methods**

### 91 ***Materials***

92 Tryptic soy agar (TSA), tryptic soy broth (TSB), peptone water, staphylococcus  
93 aureus ATCC6538, petri dish (  $\phi$  90 mm), and vaccination ring.

### 94 ***Equipment***

95 High pressure steam sterilization pot (121°C~123°C), incubator (constant  
96 temperature 37°C±2°C), vortex type vortex mixer (up to 16 mm × 150 mm tube), orbital  
97 vibrator (100 r/min~250 r/min), refrigerator (2°C~8°C), bacteria filtration efficiency  
98 detector (ZR-1000, Qindao Junray Intelligent Instrument Co., Ltd), and colony counter  
99 (ZR-1100, Qindao Junray Intelligent Instrument Co., Ltd).

### 100 ***Experimental methods***

#### 101 ***Determination method of bacterial suspension concentration***

102 A strain of staphylococcus aureus was vaccinated into 100mL TSB, then exposed  
103 to an incubator under 100r/min at 37°C. After 24h, the bacterial suspension was  
104 obtained. 1mL bacterial suspension was added to the test tube with 9mL peptone  
105 solution (1.5%), then diluted step by step to 10<sup>-7</sup>, and 0.1mL diluted bacterial  
106 suspension from 10<sup>-5</sup> to 10<sup>-7</sup> test tubes was added to TSA plate for culture. Two parallel  
107 plates were made for each gradient, then put them into the incubator at 37°C for 24h.

108 Statistic the bacterial count of each TSA plate, then take the colony number of (0-  
109 100) CFU flat gradient to count, and the concentration of bacteria suspension

110 concentrate can be calculated. Then diluted 1 mL bacteria suspension to about  $5 \times 10^5$   
111 CFU/mL, and 20 mL of which were prepared.

### 112 ***Positive quality control value calculation***

113 Perform a positive control run without a test specimen by BFE detector. Initiate  
114 the bacterial suspension by turning on the vacuum pump and adjust the flow rate  
115 through the Anderson sampler to 28.3L/min. Deliver the bacterial suspension by the  
116 peristaltic pump for 1 min. Sampling for 2 min, and the bacteria aerosols were collected  
117 on agar medium. Agar plate were cultivated in the incubator at  $(37 \pm 2)^\circ\text{C}$  for  $(24 \pm 4)$  h,  
118 then count the number of staphylococcus aureus colonies on each plate, and use the  
119 “positive hole” conversion table in accordance with the instructions of the Anderson  
120 sampler manufacturer for stages 3 to 6. The sum of staphylococcus aureus colonies on  
121 each stage is a positive quality control value of detector, and take the mean of the two  
122 totals for two positive control runs. ASTM F2101-2014 Evaluating the bacterial  
123 filtration efficiency (BFE) of medical face mask materials, using a biological aerosol  
124 of staphylococcus aureus <sup>[23]</sup> and BS EN 14683:2019 Medical face masks -  
125 Requirements and test methods <sup>[24]</sup> specifies, positive quality control value should be  
126 within the scope of the (1700-3000) CFU.

### 127 ***Bacterial aerosol MPS calculation***

128 After sampling, the agar medium were cultivated in the incubator at  $(37 \pm 2)^\circ\text{C}$  for  
129  $(24 \pm 4)$  h. From the positive control plates, the MPS of bacterial aerosol was calculated  
130 using the formula (1). BS EN 14683:2019 Medical face masks - Requirements and test  
131 methods <sup>[24]</sup> and YY0469-2011 Medical surgical masks technical requirements <sup>[25]</sup> rules,

132 the MPS should be within the scope of  $(3.0\pm 0.3)$   $\mu\text{m}$ .

133 
$$MPS = \frac{(P1 \times C1) + (P2 \times C2) + (P3 \times C3) + (P4 \times C4) + (P5 \times C5) + (P6 \times C6)}{C1 + C2 + C3 + C4 + C5 + C6} \quad (1)$$

134

135 **Table 1** Anderson sampler particle size and colony count at all levels.

|                               |    |    |    |    |    |    |
|-------------------------------|----|----|----|----|----|----|
| Stage number                  | 1  | 2  | 3  | 4  | 5  | 6  |
| Size of particle              | P1 | P2 | P3 | P4 | P5 | P6 |
| Viable “particle” plate count | C1 | C2 | C3 | C4 | C5 | C6 |

136 Where P1=7.00 $\mu\text{m}$  ;P2=4.70 $\mu\text{m}$  ;P3=3.30 $\mu\text{m}$  ;P4=2.10 $\mu\text{m}$  ;P5=1.10 $\mu\text{m}$  ;P6=0.65 $\mu\text{m}$ .

137 C1+C2+C3+C4+C5+C6 refer to positive quality control value.

138

## 139 **Results and discussion**

### 140 *The influence of Anderson sampler*

141 Four Anderson sampler from different manufacturers were selected to compare  
142 the influence of Anderson sampler in the aerosol MPS and positive quality control value,  
143 including Beijing Mingjie, Qingdao Kaiyue, Qingdao Juchuang and Weifang Aiwo.

144 The experiment condition was set as: the peristaltic pump flow is 0.1 mL/min, the spray  
145 flow is 10 L/min, and agar medium thickness is 15 mL. Positive quality control values

146 and aerosol MPS with different Anderson sampler manufacturer were shown in Table

147 2.

148 By comparing and testing the Anderson sampler from different manufacturers, it

149 is found that the aerosol MPS and positive quality control value calculated from the

150 experimental results of the Anderson sampler from different manufacturers is different  
151 under the same experimental conditions. The positive quality control value of other  
152 three experiments were all within the scope of (1700-3000) CFU except using the  
153 Weifang Aiwo's Anderson sampler. The order of aerosol MPS is Beijing Mingjie >  
154 Qingdao Kaiyue > Qingdao Juchuang > Weifang Aiwo, so the Beijing Mingjie'  
155 Anderson sampler was recommended. The design principle of Anderson sampler is as  
156 follows: when microbial aerosols pass through a nozzle or jet stream, they shoot at the  
157 front impingement plate (or the surface of the medium) according to the principle of  
158 inertia, deflecting the airflow 90°~180°. Particles of sufficient momentum, acting by  
159 inertia, move in a straight line in the original direction without following the deflection  
160 of the fluid, and are collected by impingement on the collecting plate (or on the surface  
161 of the medium). Smaller particles can follow the fluid along the streamline under the  
162 air flow without crashing down, and these bacteria-bearing particles will slip off or  
163 escape because of their small inertia. The Anderson sampler can divide the bacterial  
164 aerosol into two parts. Particles larger than a certain aerodynamic diameter can crash  
165 down from the airflow, and smaller particles can escape with the aerosol fluid passing  
166 through the sampler. As each manufacturer has different requirements for pore accuracy,  
167 the size of bacterial aerosol captured by Anderson sampler of each manufacturer is also  
168 different, so the calculated aerosol MPS is also different. The pore size and capture  
169 particles range of Anderson sampler is shown in Table 3.

170

171 **Table 2** Positive quality control values and aerosol MPS with different Anderson



172 sampler manufacturer.

| Sampler                        | Beijing Mingjie             |                                   | Weifang Aiwo                |                                   |
|--------------------------------|-----------------------------|-----------------------------------|-----------------------------|-----------------------------------|
| Peristaltic pump flow          | 0.1 mL/min                  |                                   | 0.1 mL/min                  |                                   |
| Spray flow                     | 10 L/min                    |                                   | 10 L/min                    |                                   |
| Spray pressure                 | 21.2 kPa                    |                                   | 21.2 kPa                    |                                   |
| Tablet thickness               | 15 mL                       |                                   | 15 mL                       |                                   |
| The layer number               | The positive pole count (r) | Viable “particle” plate count (C) | The positive pole count (r) | Viable “particle” plate count (C) |
| 1                              | 19                          | 19                                | 40                          | 40                                |
| 2                              | 25                          | 25                                | 34                          | 34                                |
| 3                              | 43                          | 45                                | 23                          | 24                                |
| 4                              | 265                         | 434                               | 60                          | 65                                |
| 5                              | 374                         | 1093                              | 274                         | 462                               |
| 6                              | 144                         | 179                               | 339                         | 752                               |
| Positive quality control value | /                           | 1795                              | /                           | 1377                              |
| MPS                            |                             | 1.46                              |                             | 1.20                              |

173

| Sampler               | Qingdao Kaiyue              |                                   | Qingdao Jchuang             |                                   |
|-----------------------|-----------------------------|-----------------------------------|-----------------------------|-----------------------------------|
| Peristaltic pump flow | 0.1 mL/min                  |                                   | 0.1 mL/min                  |                                   |
| Spray flow            | 10 L/min                    |                                   | 10 L/min                    |                                   |
| Spray pressure        | 20.8 kPa                    |                                   | 20.8 kPa                    |                                   |
| Tablet thickness      | 15 mL                       |                                   | 15 mL                       |                                   |
| The layer number      | The positive pole count (r) | Viable “particle” plate count (C) | The positive pole count (r) | Viable “particle” plate count (C) |

|                                |     |      |     |      |
|--------------------------------|-----|------|-----|------|
| 1                              | 13  | 13   | 10  | 10   |
| 2                              | 23  | 23   | 81  | 81   |
| 3                              | 22  | 23   | 28  | 29   |
| 4                              | 280 | 482  | 88  | 99   |
| 5                              | 370 | 1078 | 373 | 1078 |
| 6                              | 283 | 492  | 269 | 447  |
| Positive quality control value | /   | 2069 | /   | 1744 |
| MPS                            |     | 1.33 |     | 1.28 |

174

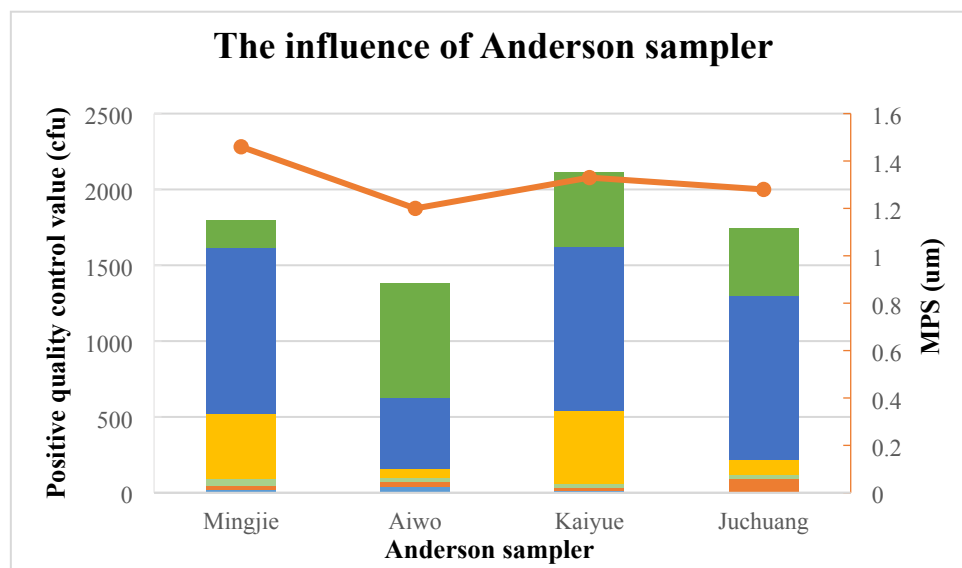

175

176 **Figure 1** The relationship of Anderson sampler with positive quality control value and  
 177 aerosol MPS (Histogram represents positive quality control value, broken line  
 178 represents aerosol MPS).

179

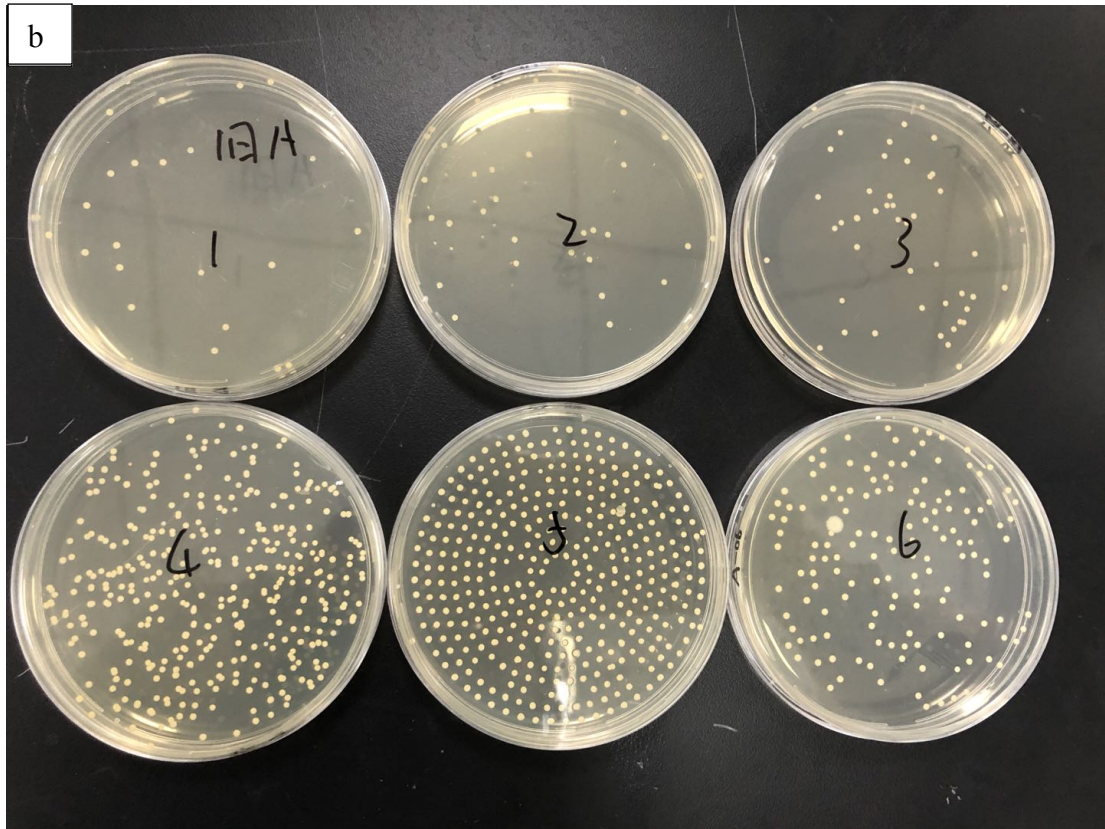

180

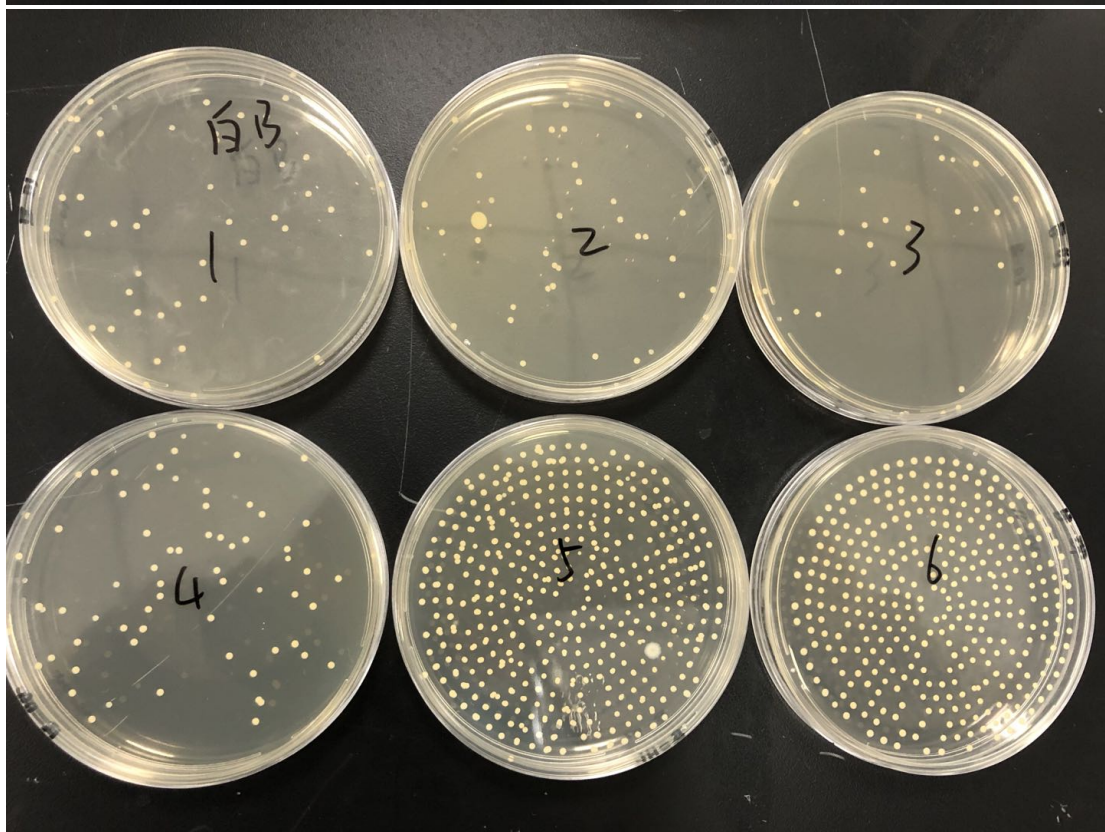

181

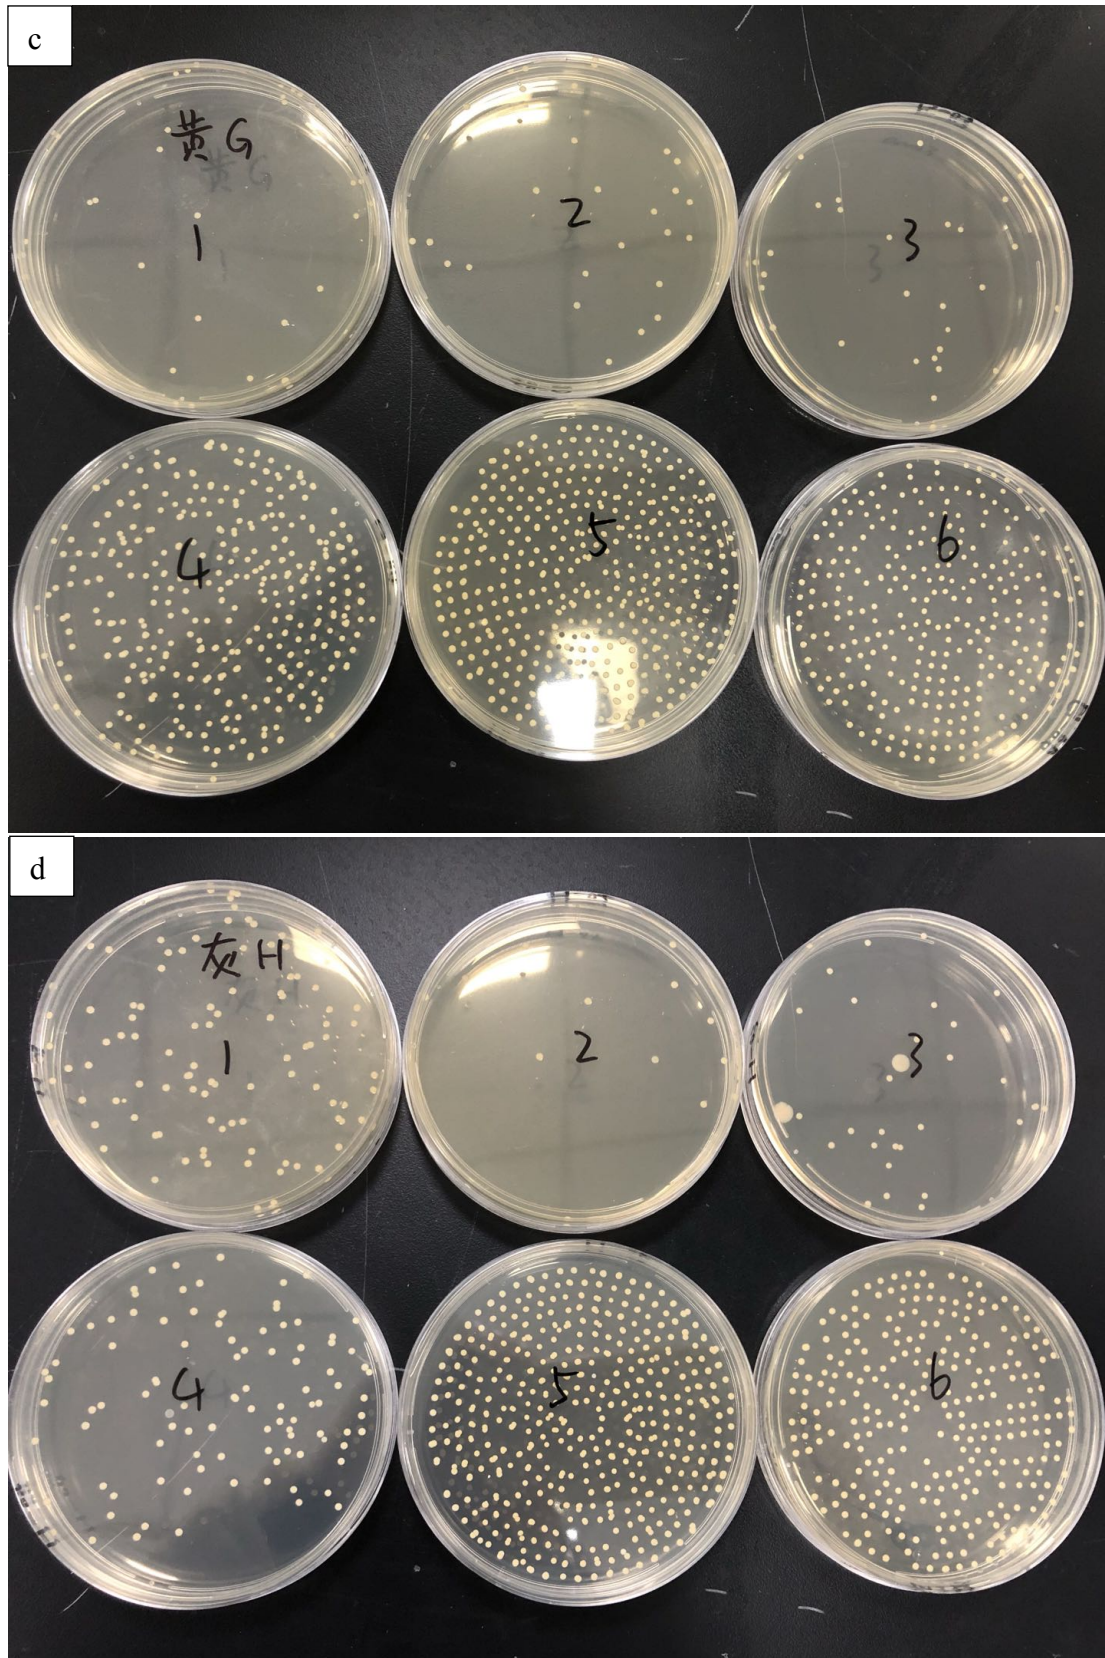

182

183

184 **Figure 2** The experimental results of different Anderson sampler (a for Beijing Mingjie,

185 b for Weifang Aiwo, c for Qingdao Kaiyue, d for Qingdao Juchuang).

186

187 **Table 3** The pore size and scope of capture particles of Anderson sampler.

| Anderson sampler stages | Pore size (mm) | The scope of capture particles (um) |
|-------------------------|----------------|-------------------------------------|
| Stage 1                 | 1.18           | >7.0                                |
| Stage 2                 | 0.91           | 4.7~7.0                             |
| Stage 3                 | 0.71           | 3.3~4.7                             |
| Stage 4                 | 0.53           | 2.1~3.3                             |
| Stage 5                 | 0.34           | 1.1~2.1                             |
| Stage 6                 | 0.25           | 0.65~1.1                            |

188

### 189 *The influence of spray flow rate*

190 Different spray flow rate was set to compare the effects of spray flow in the aerosol  
191 MPS and positive quality control value, including 6.0, 6.5, 7.0, 7.2, 7.5, and 8.0 L/min.  
192 The experiment condition was set as: the peristaltic pump flow is 0.1 mL/min, agar  
193 medium thickness is 25 mL, and Beijing Mingjie' Anderson sampler was selected.

194 The positive quality control values and aerosol MPS at different spray flow rates  
195 were shown in Table 4. The positive quality control value increases gradually with the  
196 increase of the flow rate of the sprayer, which may due to the increasing spray flow  
197 blowing more bacterial aerosols to the air chamber. However, there is no linear  
198 relationship between aerosol MPS and aerosol flow rate (Figure 3). When the spray  
199 flow rate is 7.2 L/min and 7.5 L/min, the positive quality control values conform to the  
200 range of (1700-3000) CFU, and the MPS of aerosol fall within the scope of (3.0±0.3)  
201 um. Compared to the MPS of aerosol under spray flow rate of 7.5 L/min, when the

202 spray flow rate is 7.2 L/min, the MPS is maximum and the flow for this sprayer is the  
203 most appropriate option on the premise of meeting the standard value of positive quality  
204 control. The mean aerosol particles depend on comprehensive influence, including the  
205 size of the sprayer, spray flow rate, flow of peristaltic pump, physical properties of  
206 bacteria aerosol, pore diameter, the relative position and angle of fluid pore in mixing  
207 chamber of sprayer, so the appropriate spray flow will be different for every sprayer  
208 due to very slight error on each sprayer processing.

209

210 **Table 4** Positive quality control values and aerosol MPS at different spray flow rates.

| Number | Spray flow<br>(L /min) | Positive quality control<br>value (CFU/mL) | Aerosol MPS (um) |
|--------|------------------------|--------------------------------------------|------------------|
| 1      | 6.0                    | 964                                        | 3.08             |
| 2      | 6.5                    | 1419                                       | 2.85             |
| 3      | 7.0                    | 1679                                       | 2.94             |
| 4      | 7.2                    | 1814                                       | 2.98             |
| 5      | 7.5                    | 2420                                       | 2.73             |
| 6      | 8.0                    | 2457                                       | 2.61             |

211

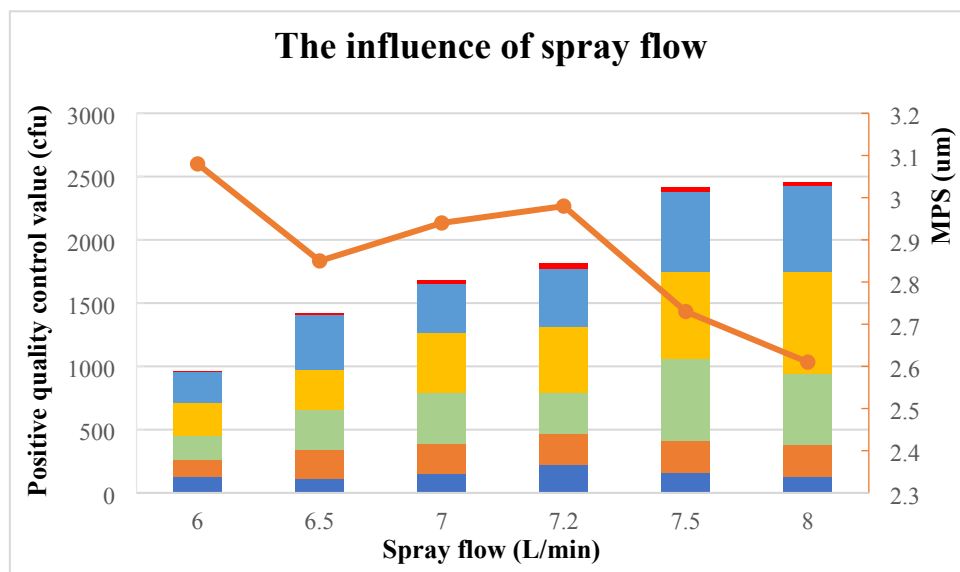

212

213 **Figure 3** The relationship of spray flow with positive quality control value and aerosol

214 MPS (Histogram represents positive quality control value, broken line represents

215 aerosol MPS).

216

### 217 *The influence of agar medium thickness*

218 Different agar medium thickness of 15, 20, 25, and 30 mL were prepared to

219 compare the influence of the thickness of agar medium in the aerosol MPS and positive

220 quality control value. The experiment condition was set as: the peristaltic pump flow is

221 0.1 mL/min, the spray flow rate is 7.2 L/min, and Beijing Mingjie' Anderson sampler

222 was selected.

223 The positive quality control values and aerosol MPS under different medium

224 thickness were shown in Table 5. As the agar medium thickness increased, both the

225 positive quality control value and aerosol MPS increased gradually (Figure 4). When

226 the agar medium thickness was 25mL or 30mL, the MPS could meet the requirement

227 of (3±0.3) um. This is because the impact distance has an influence on the sampling

228 efficiency. The aerosol particles cannot come down if the distance is too far, while it is  
229 difficult to operate with short distance. The impact distance of the Anderson sampler is  
230 about 2.5mm. When the sampler structure is fixed, the thickness of the agar medium in  
231 the plate determines the impact distance. Adding 24, 27 and 30mL agar medium to the  
232 petri dish, respectively, and their impact distances were 3, 2.5 and 2.0mm. But the  
233 percentage distribution of the three impact distance particles in the six nodes was  
234 roughly similar. Therefore, Ranz and Wong <sup>[26]</sup> recommend that adding 27mL agar  
235 medium into Anderson sampler is optimal.

236

237 **Table 5** Positive quality control values and aerosol MPS under different medium  
238 thickness.

| Number | Medium thickness<br>(mL) | Positive quality control<br>value (CFU/mL) | Aerosol MPS (um) |
|--------|--------------------------|--------------------------------------------|------------------|
| 1      | 15                       | 1685                                       | 2.38             |
| 2      | 20                       | 1907                                       | 2.47             |
| 3      | 25                       | 1917                                       | 2.87             |
| 4      | 30                       | 2053                                       | 2.90             |

239



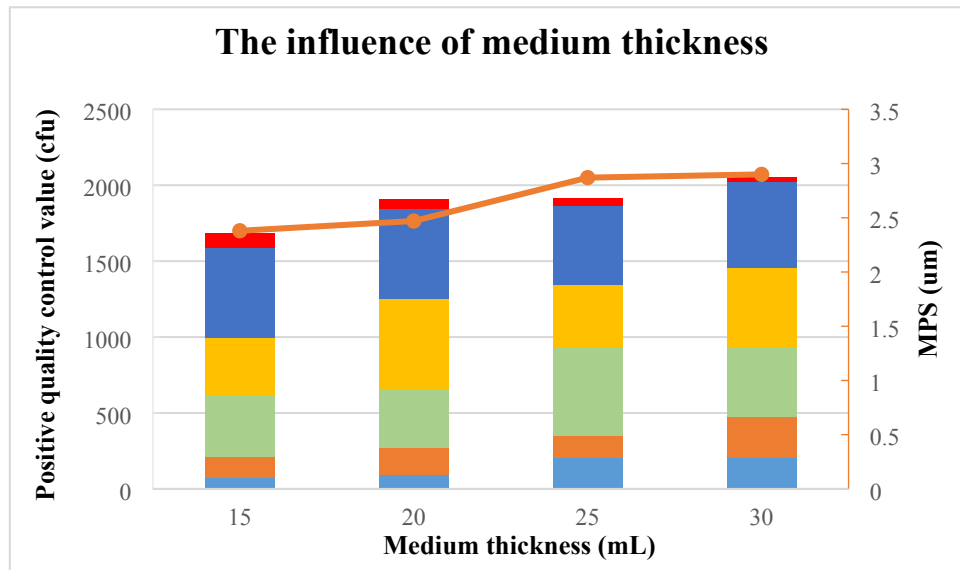

240

241 **Figure 4** The relationship of medium thickness with positive quality control value and  
242 aerosol MPS (Histogram represents positive quality control value, broken line  
243 represents aerosol MPS).

244

#### 245 *The influence of peristaltic pump flow*

246 Different peristaltic pump flow rate was selected to compare the influence of  
247 peristaltic pump flow in the aerosol MPS and positive quality control value, including  
248 0.1, 0.3, 0.5, 0.7, 0.9 mL/min. The experiment condition was set as: the spray flow rate  
249 is 7.2 L/min, agar medium thickness is 25 mL, and Beijing Mingjie' Anderson sampler  
250 was selected.

251 The positive quality control values and aerosol MPS under different peristaltic  
252 pump flow were shown in Table 6. With the increase of peristaltic pump flow, the  
253 positive quality control value gradually increased, while the aerosol MPS was basically  
254 in a downward trend (Figure 5). When the peristaltic pump flow was 0.1 mL/min, the  
255 aerosol MPS reached its maximum value. This may be attributed to that the microbial

256 quantity of bacterial aerosols entering the sprayer increased with the peristaltic pump  
 257 flow under the same spray flow. However, small particle aerosols produced far more  
 258 than large particles of bacterial aerosols, so the MPS of aerosols in a downtrend  
 259 basically although the positive quality value increases gradually. Therefore, we suggest  
 260 that the peristaltic pump flow of 0.1mL/min is the most appropriate option.

261

262 **Table 6** Positive quality control values and aerosol MPS under different peristaltic  
 263 pump flow.

| Number | Peristaltic pump flow<br>(mL/min) | Positive quality control<br>value (CFU/mL) | Aerosol MPS (um) |
|--------|-----------------------------------|--------------------------------------------|------------------|
| 1      | 0.1                               | 1814                                       | 2.98             |
| 2      | 0.3                               | 2523                                       | 2.85             |
| 3      | 0.5                               | 2723                                       | 2.62             |
| 4      | 0.7                               | 3821                                       | 2.69             |
| 5      | 0.9                               | 7842                                       | 2.42             |

264

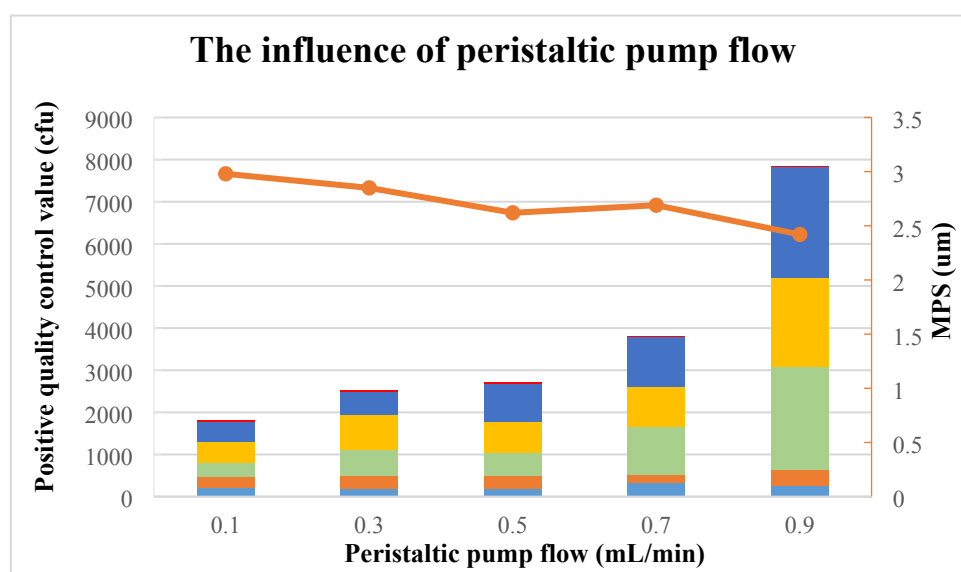

265

266 **Figure 5** The relationship of peristaltic pump flow with positive quality control value

267 and aerosol MPS (Histogram represents positive quality control value, broken line  
268 represents aerosol MPS).

269

## 270 **Conclusion**

271 The mask BFE is one of the key indicators for detecting masks. The aerosol MPS  
272 and positive quality control value are the key parameters of BFE system. This study  
273 discusses the major influence factors of the MPS of bacterial aerosols and positive  
274 quality control value of BFE system, including Anderson sampler, spray flow, agar  
275 medium thickness, and peristaltic pump flow. The experimental results show that the  
276 machining precision of Anderson sampler have great influence on aerosol MPS and  
277 positive quality control value. With the increase of spray flow rate, the positive quality  
278 control value will increase gradually, but the effect on aerosol MPS is not a simple  
279 linear relationship. As agar medium thickness increased, the positive quality control  
280 value and aerosol MPS increased gradually. With the increase of peristaltic pump flow,  
281 the positive quality control value increased gradually, while the aerosol MPS was  
282 basically in a downward trend. When the peristatic pump flow rate was 0.1mL/min, the  
283 spray flow rate was 7.2L/min, the agar medium thickness was 27mL, and the Anderson  
284 sampler of Beijing Mingjie was used for the experiment, the positive quality control  
285 value and aerosol MPS were both within the acceptable range and were the optimal  
286 parameters. This study provides guidance for manufacturers of BFE detector and  
287 theoretical basis for testing institutions to test the BFE of masks, which is important for  
288 the human health, especially during the occurrence of viral pandemics such as

289 "COVID-19".

290 **References**

- 291 1. WHO. Statement on the Second Meeting of the International Health Regulations (2005)  
292 Emergency Committee Regarding the Outbreak of Novel Coronavirus(2019-nCoV); 2020.
- 293 2. Seojin Jung, Jaejin An, Hyungjin Na and Jooyoun Kim. Surface Energy of Filtration Media  
294 Influencing the Filtration Performance against Solid Particles, Oily Aerosol, and Bacterial  
295 Aerosol. *Polymers*. 2019; 11:935.
- 296 3. Yan, D.; Zhang, T.; Su, J.; Zhao, L.-L.; Wang, H.; Fang, X.-M.; Zhang, Y.-Q.; Liu, H.-Y.; Yu,  
297 L.-Y. Structural variation in the bacterial community associated with airborne particulate matter  
298 in Beijing, China, during Hazy and Nonhazy Days. *Appl. Environ. Microbiol.* 2018; 84,  
299 e00004-18.
- 300 4. Duquenne, P.; Marchand, G.; Duchaine, C. Measurement of endotoxins in bioaerosols at  
301 workplace: A critical review of literature and a standardization issue. *Ann. Occup. Hyg.* 2013;  
302 57, 137–172.
- 303 5. Ali, M.U.; Liu, G.; Yousaf, B.; Ullah, H.; Abbas, Q.; Munir, M.A.M. A systematic review on  
304 global pollution status of particulate matter-associated potential toxic elements and health  
305 perspectives in urban environment. *Environ. Geochem. Health* 2018; 1–32.
- 306 6. Prussin, A.J.; Garcia, E.B.; Marr, L.C. Total concentrations of virus and bacteria in indoor and  
307 outdoor air. *Environ. Sci. Technol. Lett.* 2015; 2, 84–88.
- 308 7. Lai, A.C.K.; Poon, C.K.M.; Cheung, A.C.T. Effectiveness of facemasks to reduce exposure  
309 hazards for airborne infections among general populations. *J. R. Soc. Interface* 2012; 9, 938–  
310 948.
- 311 8. Makison Booth, C.; Clayton, M.; Crook, B.; Gawn, J.M. Effectiveness of surgical masks against  
312 influenza bioaerosols. *J. Hosp. Infect.* 2013; 84, 22–26.
- 313 9. Rengasamy, A.; Zhuang, Z.; Berryann, R. Respiratory protection against bioaerosols: Literature  
314 review and research needs. *Am. J. Infect. Control* 2004; 32, 345–354.
- 315 10. Rubino, I.; Choi, H.J. Respiratory protection against pandemic and epidemic diseases. *Trends*  
316 *Biotechnol.* 2017; 35, 907–910.
- 317 11. Sublett, J.L. Effectiveness of air filters and air cleaners in allergic respiratory diseases: A review  
318 of the recent literature. *Curr. Allergy Asthma Rep.* 2011; 11, 395–402.
- 319 12. National plan for the prevention and control of influenza pandemic. Paris: General Secretariat  
320 for National Defence;2007.
- 321 13. Australian health management plan for pandemic influenza: important information for all  
322 Australians. Canberra: Department of Health and Ageing, Commonwealth of Australia; 2006.
- 323 14. Department of Health and Human Services. HHS pandemic influenza plan. Washington: The  
324 Department; 2005.
- 325 15. MacIntyre CR, Cauchemez S, Dwyer DE, Seale H, Cheung P, Browne G, et al. Face Mask Use  
326 and Control of Respiratory Virus Transmission in Households. *Emerg Infect Dis.* 2009;  
327 15(2):233–41.
- 328 16. Brienen NCJ, Timen A, Wallinga J, Van Steenbergen JE, Teunis PFM. The Effect of Mask Use  
329 on the Spread of Influenza During a Pandemic. *RISK ANAL.* 2010; 30(8):1210–8.
- 330 17. Van der Sande M, Teunis P, Sabel R. Professional and home-made face masks reduce exposure  
331 to respiratory infections among the general population. *PLOS ONE.* 2008 2008-01-01; 3(7):

- 332 e2618.
- 333 18. Sana Ullah, Azeem Ullah, Jaeyun Lee, Yeonsu Jeong, Motahira Hashmi, Chunhong Zhu, Kye-  
334 II Joo, Hyung Joon Cha, and Ick-Soo Kim. Reusability Comparison of Melt-Blown vs  
335 Nanofiber Face Mask Filters for Use in the Coronavirus Pandemic. *ACS Applied nano materials*.  
336 2020; 3: 7231-7241.
- 337 19. Wu H, Huang J, et al. Facemask shortage and the novel coronavirus disease (COVID-19)  
338 outbreak: Reflections on public health measures. *EClinicalMedicine*. 2020:100329.
- 339 20. Hou F, Zhou F, Xu X, Wang D, Xu G, Jiang T, et al. Personnel protection strategy for healthcare  
340 workers in Wuhan during the COVID-19 epidemic. *Precision Clinical Medicine*,  
341 2020;3(3):169-174.
- 342 21. Dijia Wang, Yanjun You, Xiaoli Zhou, Zhiyong Zong, Hao Huang, Hui Zhang, Xin Yong,  
343 Yifan Cheng, Liu Yang, Qiong Guo, Youlin Long, Yan Liu, Jin Huang, Liang Du. Selection of  
344 homemade mask materials for preventing transmission of COVID-19: A laboratory study.  
345 *PLOS ONE*. 2020; 15(10): e0240285.
- 346 22. L.K.P. Suen, Y.P. Guo, S.S.K. Ho, C.H. Au-Yeung, S.C. Lam. Comparing mask fit and  
347 usability of traditional and nanofibre N95 filtering facepiece respirators before and after nursing  
348 procedures. *J Hosp Infect*. 2020; 104: 336-343.
- 349 23. ASTM F2101. Evaluating the bacterial filtration efficiency (BFE) of medical face  
350 mask materials, using a biological aerosol of staphylococcus aureus; 2014.
- 351 24. BS EN14683. Medical face masks. Requirements and test methods. London: The British  
352 Standards Institution; 2019.
- 353 25. YY0469. Medical surgical masks technical requirements; 2011.
- 354 26. May KR. Calibration of a modified Andersen bacterial aerosol sampler. *Appl Microbiol*. 1964;  
355 12(1):37.
